# Supplementary material for: Chronic TCR Signaling-Driven Suppression of the FOXO-KLHL6 Axis Promotes T Cell Exhaustion
Source: Research Square preprint supplement (doi:10.21203/rs.3.rs-7913669/v1), 2025-11-07
Supplement: Supplementary file 1 [file 7d7123a17487fe0acfd893ce.docx]

**METHOD DETAILS**

**Mice**

Male and female mice were used for the study. CD45.1+ OT-I TCR transgenic mice on a C57BL/6N background were housed together. CD45.2+ female C57BL/6N mice aged 6-8 weeks were purchased from the Vital River (Zhejiang, China) as recipients. 4-week-old *Klhl6*+/− C57BL/6J mice were purchased from Cyagen (Tianjin, China). The *Klhl6*+/− C57BL/6J mice were hybridization with OT-I mice or C57BL/6N mice to generate *Klhl6-/-* OT-I mice or *Klhl6-/-* mice for subsequent experiments. All mice were kept in a specific-pathogen-free facility, and all animal experiments were performed with the approval of the Institutional Animal Care and Use Committee (IACUC) of Suzhou Institute of Systems Medicine (ISM-IACUC-0151-R). Mice were housed in standard conditions, with 12 h/12 h light/dark cycles and a controlled temperature of 22-24 °C and humidity of 60%, with unrestricted food and water availability, and were examined daily. All mice were used at 8-16 weeks old. All tumor burdens did not exceed the permission of the Institutional Animal Care and Use Committee of Suzhou Institute of Systems Medicine. Age- and sex-matched mice were assigned randomly to experimental and control groups.

**Cell lines**

HEK293T and Jurkat cells were purchased from the American Type Culture Collection (ATCC) and maintained in DMEM medium (supplemented with 10% fetal bovine serum (FBS) and 1% penicillin-streptomycin (P/S)) or RPMI-1640 medium (supplemented with 10% FBS, 1% P/S, 1% GlutaMAX, 0.1 M HEPES, 1% non-essential amino acids, 1 mM sodium pyruvate and 50 μM β-mercaptoethanol). All the above reagents were purchased from Gibco.

**Plasmids**

Mouse *Klhl6* and *Foxo1* genes were amplified from the mice cDNA library. Retroviral plasmid (MSGV-Thy1.1-*Klhl6*, MSGV-Thy1.1-*Foxo1WT*, MSGV-Thy1.1-*Foxo1*AAA and MSGV-Thy1.1-Vector) and packaging vector (pCL-Eco) plasmid were used to produce retrovirus in HEK293T cells using 293 Transfection Reagent (Mirus). These retroviruses were then transduced into OT-I CD8+ T cells. The MESV-ShCtrl-EGFP plasmid (Cat: 85587) from Addgene was employed for FOXO1 knockdown, and packaging vector (pHIT60, RD114, or pCL-Eco) were used to produce retrovirus, which were utilized to transduce into Jurkat or OT-I CD8+ T cells.

**Primary murine T cell isolation, viral transduction, and culture**

Naïve OT-I T lymphocytes were isolated from the spleens and peripheral lymph nodes (pLN) of OT-I mice (6-8 weeks) using a CD8+ Naïve T cell isolation kit (BioLegend) according to the manufacturer’s instruction. Primary murine T cells were counted and then resuspended in RPMI-1640 medium supplemented with 10% FBS, 1% P/S, 1% GlutaMAX, 0.1 M HEPES, 1% non-essential amino acids, 1 mM sodium pyruvate and 50 μM β-mercaptoethanol in the presence of mouse IL-2 (20U/mL, Peprotech). Then, the resuspended CD8+ OT-IT cells were seeded at a concentration of 1 million cells/mL on 24-well plates with overnight-bound anti-mouse CD3 (2 μg/mL, BioLegend) and anti-mouse CD28 (1 μg/mL, BioLegend) antibodies. Cells were activated for 48 h and then transferred out of the activation plates, passaged to new plates every two days with a concentration of 1 million cells/mL. For chronically stimulated assay *in vitro*, OT-I T cells were activated by anti-CD3/CD28 antibodies for 4 days, and then chronically stimulated *in vitro* using anti-CD3 (2 μg/mL) antibody treatment every 2 days up to 6 days for analysis. For *in vitro* transduction experiments, 7.5×105 OT-I cells were transduced with unconcentrated retroviral supernatant after 24 h of activation in 24-well plates coated with RetroNectin reagent (15 ug/mL, Takara). Following centrifugation at 2500 rpm for 90 min at 30 °C, T cells were cultured in the incubator for 24 h. The transduction was repeated 24 h later and then returned to fresh medium for culture for 24 h. The positive cells were sorted by flow cytometry for subsequent experiments.

**Human T cell isolation, viral transduction, and culture**

Human PBMCs from healthy donors were purchased from Sailybio (Shanghai, China) and isolated using Lymphoprep (Cytiva) according to the manufacturer’s protocol. Isolated PBMCs were cultured in RPMI-1640 medium supplemented with 5% Human Serum AB (Gemini), 1% GlutaMAX, 1% non-essential amino acids, 1% P/S, 1 mM sodium pyruvate, 0.1 M HEPES and 50 μM β-mercaptoethanol in the presence of human IL-2 (100 U/mL, Peprotech). PBMCs were activated by anti-human CD3 (1 μg/mL, BioLegend) and anti-human CD28 (1 μg/mL, BioLegend) monoclonal antibodies for 2 days and then transferred out of the activation plates, passaged to new plates every two days with a concentration of 1.3 million cells/mL. For chronically stimulated assay *in vitro*, the PBMCs were activated by anti-CD3/CD28 antibodies and cultured for 8 days, followed by chronic stimulation *in vitro* using anti-CD3 (2 μg/mL) antibody treatment every 2 days up to 6 days.

**B16 tumor model and adoptive cell transfer immunotherapy**

To investigate the anti-tumor activity of T cells *in vivo*, 2×105 B16-OVA melanoma cells were subcutaneously injected into female C57BL/6N (CD45.2+) mice. 9 days after tumor implantation, each tumor-bearing mouse was intravenously injected with with 3×106 CD45.1+ CD8+ OT-I T cells were transduced with *GFP*-*shCtrl* +*Thy1.1*-*vec, GFP*-*shCtrl +Thy1.1*-*Klhl6, GFP*-*shFoxo1*+*Thy1.1*-*vec,* or *GFP*-*shFoxo1+Thy1.1*-*Klhl6*, respectively, which had been expanded for 6 days *in vitro*. Tumor-bearing mice received 5 Gy of sublethal irradiation for lymphodepletion one day before ACT. For the analysis of functional phenotype, mice were euthanized and tissues from tumors, spleens, and lymph nodes were collected at day 14 after ACT, and transferred T cells were isolated from the tumor, spleen, and lymph nodes.

**RNA-Sequencing**

For the transcriptional profiling of Tex cells, we established a B16-OVA melanoma model to analyze tumor antigen-specific CD8+ T cell exhaustion. Briefly, OT-I CD8+ T cells were activated *in vitro* using anti-CD3 and anti-CD28 antibodies. On day 9 following the implantation of B16-OVA tumors, 3×106 OT-I CD8+ T cells were adoptively transferred to each tumor-bearing mouse. At day 14 after the adoptive transfer, cells were sorted from tumors and spleens using flow cytometry. PD-1 and TIM-3 were used to label different subsets of exhausted TILs: the PD-1-TIM-3- population, PD-1+TIM-3- population and PD-1+TIM-3+ population. For the transcriptional analysis of activation was performed on Naïve CD8⁺ T cells and CD8⁺ T cells activated in vitro with anti-mouse CD3 for 48 hours. Total RNA was extracted using the RNeasy Micro Kit (Qiagen) following the manufacturer’s instruction and stored at -80 °C for RNA sequencing.RNA integrity was assessed using the Agilent 2100 Bioanalyzer (Agilent). Subsequently, the libraries were prepared using the TruSeq RNA sample prep kit (FC-122-1001, Illumina). These libraries were then subjected to sequencing on an Illumina NovaSeq 6000 (PE150) platform, generating approximately 40 million paired-end reads (Novogene).

**CUT&RUN-qPCR**

OT-I T cells were activated *in vitro* using anti-CD3 and anti-CD28 antibodies and cultured for 4 days. Subsequently, these cells were seeded at a concentration of 1.5 million cells/mL on a new 24-well plate with anti-CD3 antibodies bound overnight and cultured for 24 h. Similarly, PBMCs were reactivated with anti-CD3 for 24 h on day 9 after activation. Dead cells were removed, and live OT-I T cells and PBMCs were collected for subsequent experiments. The CUT&RUN assay was conducted as previously described with slight modifications using CUT&RUN Assay Kit (HD102-01, Vazyme) following the manufacturer’s instruction. The primers used for CUT&RUN-qPCR are listed below:

Forward (mouse): AACTATTTCAGGTCAGTCTG

Reversed (mouse): ACATGATACCTAACATACTC

Forward (human): TCATTGACGACTTGGGTTAT

Reversed (human): TTCTGGAAGAGGAGTGTCCT

**qRT–PCR**

Total RNA from cells were extracted using Trizol reagent (Takara) or the RNeasy Micro Kit (Qiagen), according to the manufacturer’s instruction. The extracted RNAs were reverse-transcribed into cDNA using HiScript Reverse Transcriptase (Vazyme). Quantitative real-time PCR was performed using the ABI prism 7500 real-time PCR System (Thermo Fisher) and 2 × SYBR Green qPCR Master Mix (Bimake), following the respective manufacturer’s protocols. The data is presented as the fold change in gene expression normalized to an internal reference gene (*B2M*). The relative expression of mRNA was calculated using the 2−ΔΔCT method. Primer sequences used for qPCR are listed below:

*Klhl6* Forward (mouse): GCTTGGAAGGACCCTTAGCAC

*Klhl6* Reversed (mouse): CGTCTGTCAAAGCATTTTCCTCT

*KLHL6* Forward (human): GCAGCCAGCAACTATTTCAGG

*KLHL6* Reversed (human): ACGTGTAGTCCAACAGAGTGT

*B2m* Forward (mouse): AGACTGATACATACGCCTGCAG

*B2m* Reversed (mouse): GCAGGTTCAAATGAATCTTCAG

*B2m* Forward (human): TGTCTTTCAGCAAGGACTGGT

*B2m* Reversed (human): ATGCTGCTTACATGTCTCGAT

**Flow cytometry** **and sorting**

T cells were stained using fluorescent antibodies and subsequently analyzed by flow cytometry. To prepare for staining, T cells were collected and washed once with FACS buffer (PBS with 2% FBS). For surface protein staining, cells were stained with fluorescently conjugated antibodies and Live/Dead Fixable Dead Cell Stain Kit (Invitrogen) in FACS buffer, then fixed with 2% paraformaldehyde (Casmart) for 30 min at 4 ℃. For transcription factor staining, cells were pre-stained with Live/Dead Fixable Dead Cell Stain Kit and fluorescently conjugated antibodies in FACS buffer to detect surface markers. The cells were then fixed for 30 min at 4 ℃ using FOXP3/Transcription Factor Fixation Buffer (Invitrogen) and stained with transcription factor antibodies in Permeabilization Buffer. For detection of intracellular cytokines, cells were stimulated with phorbol myristate acetate (PMA) in the presence of Brefeldin A (BFA) (BioLegend) for 4.5 h. Then, the pre-stained cells were fixed and stained with cytokines antibodies in the permeabilization buffer. After staining, cells were resuspended in FACS buffer for flow cytometric analysis. Flow cytometry data were collected using BD LSR Fortessa and BD FACSDiva (v8.0.2), and analyzed with FlowJo (v10.4) software. Cell sorting was performed using BD FACS Aria III and BD FACSDiva (v8.0.2). Antibodies used for flow cytometric analyses and sorting were as followed: anti-mouse CD8 (BioLegend, Cat#100759, RRID:AB_2563510), anti-mouse TIM3 (BioLegend, Cat#134010, RRID:AB_2632734), anti-mouse PD-1 (BioLegend, Cat#135208, RRID:AB_2159184), anti-mouse CD62L (Biolegend, Cat#104412, RRID:AB_313099), anti-mouse/human CD44 (Biolegend, Cat#163607, RRID:AB_2894634), anti-human/mouse TOX (Invitrogen, Cat#12-6502-82, RRID:AB_10855034), anti-mouse TNF-α (BioLegend, Cat#506306, RRID: AB_2797631), anti-mouse IFN-γ (BioLegend, Cat#505810, RRID: AB_315404).

**Western blotting**

For protein expression analysis, cells were harvested, washed with cold PBS, and then lysed in 1% SDS (Sangon) for 30 minutes on ice. The protein samples were denatured at 95 ℃ for 15 min and stored at -20 °C. Protein concentration was determined using the BCA protein assay kit (Merck) following the manufacturer’s instruction. Protein samples were separated on SDS-PAGE gels and then transferred onto methanol-activated polyvinylidene fluoride (PVDF) membranes (Millipore). Membranes were blocked with 5% nonfat milk in PBS containing Tween-20 (0.1%) for 1 h and then incubated overnight at 4 °C with the respective primary antibodies. The following day, membranes were incubated with the corresponding HRP-coupled secondary antibodies for 2 h at room temperature, followed by signal development using ECL Western Blotting substrate (Tanon) and the Chemidoc automated detection system (Bio-Rad). Data analysis was performed using Image J (v1.8.0) software. Primary antibodies and secondary antibodies used were as followed: KLHL6 (Invitrogen, PA5-19213), Akt (pan) (CST, 4691T), Phospho-AKT(Ser473) (CST, 4060T), FoxO1 (CST, 2880S), Phospho-FoxO1 (Thr24)/FoxO3a (Thr32) (CST, 2486S), Phospho-FoxO1 (Ser319) (CST, 2486T), FOXO3A (Proteintech, 66428-1), Phospho-FoxO3a (Ser253) (CST, 9466T), β-Actin (Proteintech, 66009-1), Anti-rabbit IgG (HRP-linked) (CST, 7074), Anti-mouse IgG (HRP-linked) (CST, 7076). And Direct-load Color Prestained Protein Marker (M221, GenStar) was used in all WB assays.

**Statistical analysis**

Statistical analyses were performed using GraphPad Prism (version 8.0). A two-tailed Student’s *t*-test was employed for comparing two groups. For multiple comparisons, a two-way ANOVA with Tukey’s or Sidak’s multiple-comparisons test was applied. The log-rank (Mantel-Cox) test was performed for comparing mouse survival curves. Data are presented as mean ± s.e.m. The number of mice used per experiment and the number of experimental repeats are indicated in the figure legends. p<0.05 was considered statistically significant.
